# Supplementary material for: FSCN1 promotes proliferation, invasion and glycolysis via the IRF4/AKT signaling pathway in oral squamous cell carcinoma
Source: Springer Nature journal article supplement (doi:10.1186/s12903-023-03191-9), 2023-07-25
Supplement: MOESM1 [file 25845476]

Rep-1

Rep-2

AKT 60KDA

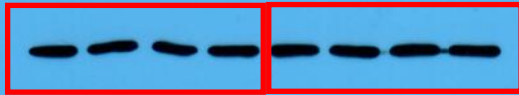

AKT 60kDa

0538007.004824

IRF4 52KDA

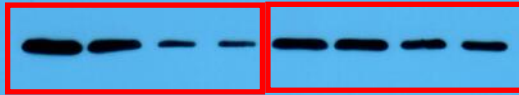

IRF4 52kDa

p-AKT 60KDA

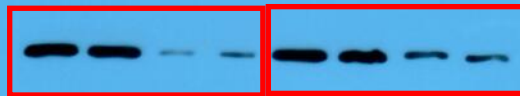

p-AKT 60kDa

Vimentin 57KDA

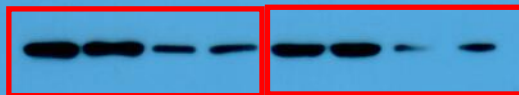

Vimentin  
57kDa

FSCN1 55KDA

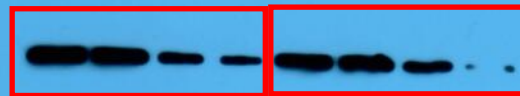

FSCN1  
55kDa

GAPDH 37KDA

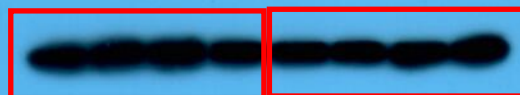

37kDa  
GAPDH

028400100800

E-cadherin 135KDA

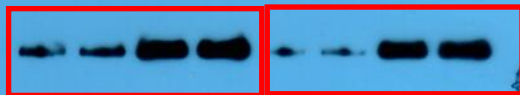

135kDa  
E-cadherin

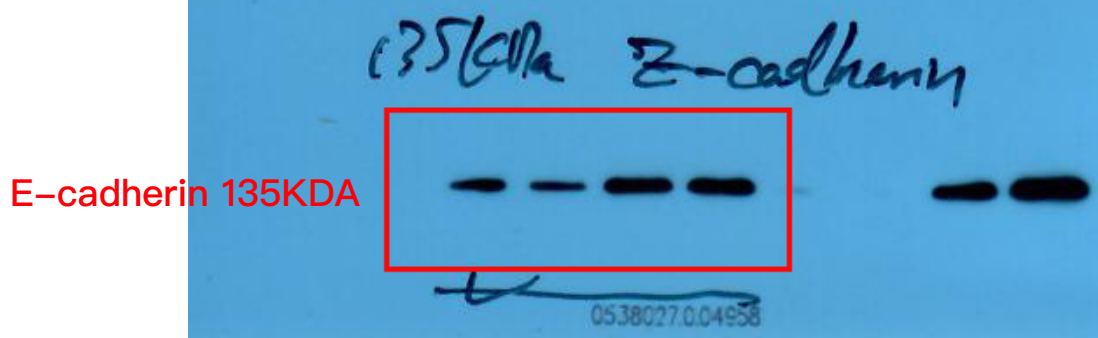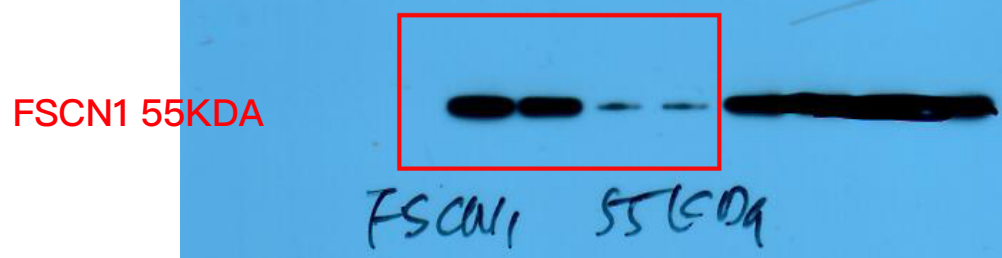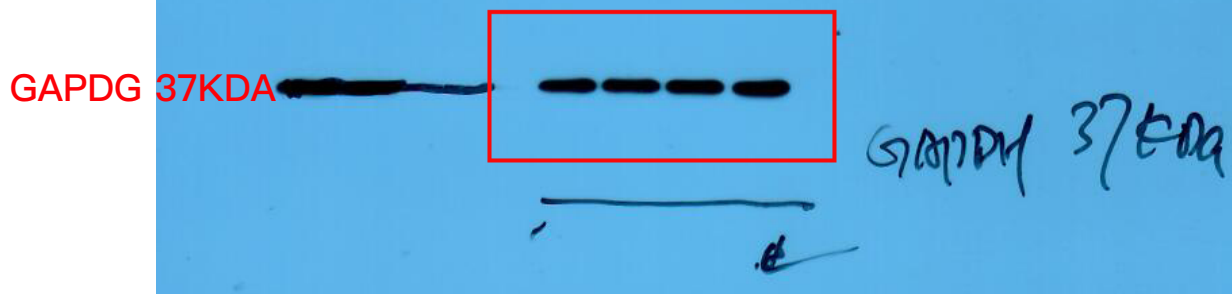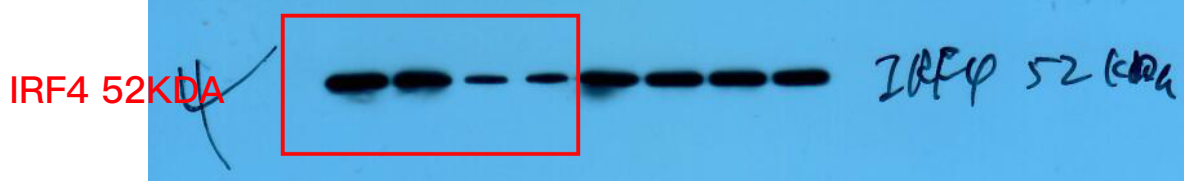

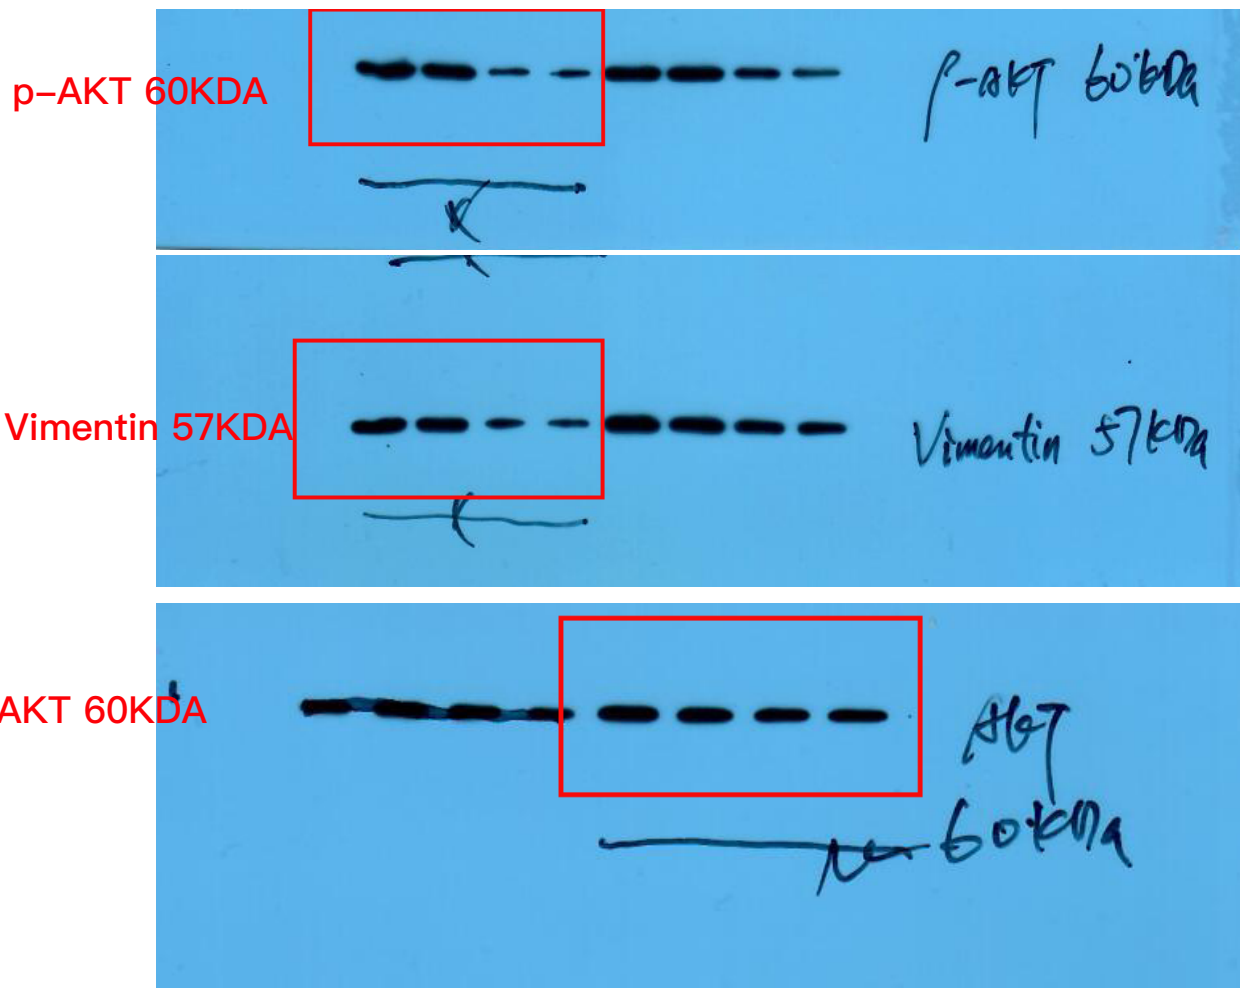

sample in each lane from left to right: **SCC15 sh-NC; HSC3 sh-NC; SCC15 sh-FSCN1; HSC3 sh-FSCN1**
